# Supplementary material for: Polyphenolic Extracts from Spent Coffee Grounds Prevent H2O2-Induced Oxidative Stress in Centropomus viridis Brain Cells
Source: MDPI journal article supplement (doi:10.3390/molecules26206195), 2021-10-14
Supplement: s1 [file s1]

Dataset: Untitled

Last Altered: Friday, May 14, 2021 22:45:01 Mountain Daylight Time (Mexico)

Printed: Friday, May 14, 2021 22:45:28 Mountain Daylight Time (Mexico)

Method: C:\MassLynx\waters1.PRO\MethDB\Mayo quinico 3.mdb 14 May 2021 15:22:46

Calibration: C:\MassLynx\waters1.PRO\CurveDB\New folder\Curva\_quinico\_mayo\_3.cdb 14 May 2021 15:19:26

Compound name: ac. quinico

|   | # Name     | Type    | RT   | Area       | Response   | ug/mL  | %Dev |
|---|------------|---------|------|------------|------------|--------|------|
| 1 | 1 cafe-004 | Analyte | 0.90 | 141908.813 | 141908.813 | 39.414 |      |

Compound name: ac. quinico

Correlation coefficient:  $r = 0.997278$ ,  $r^2 = 0.994564$ Calibration curve:  $3596.92 * x + 141.215$ 

Response type: External Std, Area

Curve type: Linear, Origin: Exclude, Weighting: 1/x, Axis trans: None

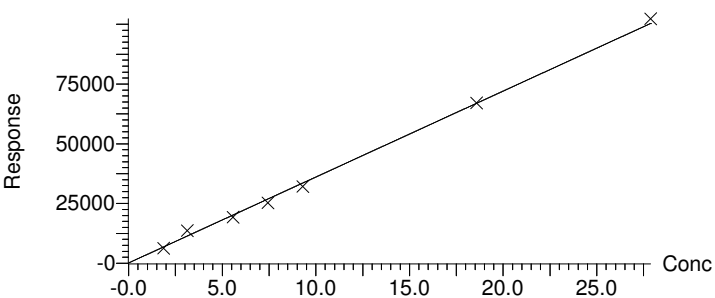

Dataset:        Untitled

Last Altered:    Friday, May 14, 2021 22:45:01 Mountain Daylight Time (Mexico)

Printed:        Friday, May 14, 2021 22:45:28 Mountain Daylight Time (Mexico)

Method: C:\MassLynx\waters1.PRO\MethDB\Mayo quinico 3.mdb 14 May 2021 15:22:46

Calibration: C:\MassLynx\waters1.PRO\CurveDB\New folder\Curva\_quinico\_mayo\_3.cdb 14 May 2021 15:19:26

Compound name: ac. quinico

Correlation coefficient:  $r = 0.997278$ ,  $r^2 = 0.994564$ Calibration curve:  $3596.92 * x + 141.215$ 

Response type: External Std, Area

Curve type: Linear, Origin: Exclude, Weighting: 1/x, Axis trans: None

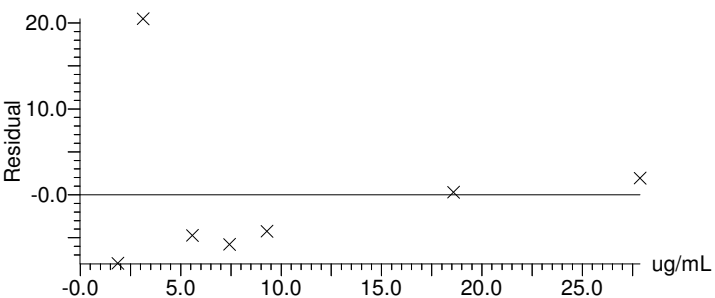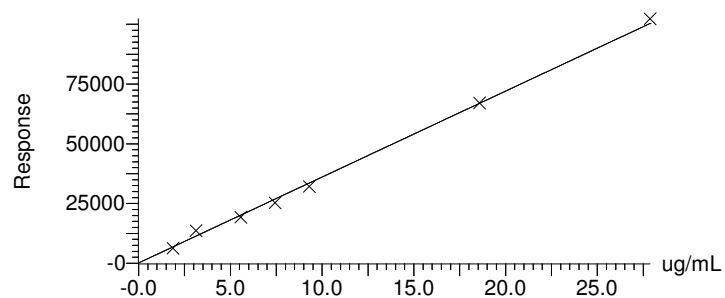

Dataset: Untitled

Last Altered: Friday, May 14, 2021 22:45:01 Mountain Daylight Time (Mexico)

Printed: Friday, May 14, 2021 22:45:28 Mountain Daylight Time (Mexico)

Method: C:\MassLynx\waters1.PRO\MethDB\Mayo quinico 3.mdb 14 May 2021 15:22:46

Calibration: C:\MassLynx\waters1.PRO\CurveDB\New folder\Curva\_quinico\_mayo\_3.cdb 14 May 2021 15:19:26

Name: cafe-004, Date: 14-May-2021, Time: 15:03:41, ID: , Description: 1

**ac. quinico**

cafe-004 Smooth(Mn,3x2) F2:TOF Daughter,ES-

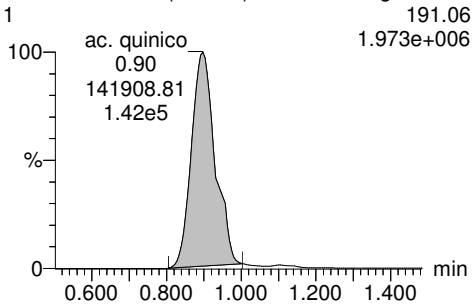

| ID | Name        | Trace  | RT   | Area       | ug/mL  |
|----|-------------|--------|------|------------|--------|
|    | ac. quinico | 191.06 | 0.90 | 141908.813 | 39.414 |
