# Supplementary material for: Polyphenolic Extracts from Spent Coffee Grounds Prevent H2O2-Induced Oxidative Stress in Centropomus viridis Brain Cells
Source: MDPI journal article supplement (doi:10.3390/molecules26206195), 2021-10-14
Supplement: s1 [file s1]

Dataset: Untitled

Last Altered: Friday, May 14, 2021 22:47:41 Mountain Daylight Time (Mexico)

Printed: Friday, May 14, 2021 22:47:54 Mountain Daylight Time (Mexico)

Method: C:\MassLynx\waters1.PRO\MethDB\Mayo cumarico 3.mdb 14 May 2021 15:21:28

Calibration: C:\MassLynx\waters1.PRO\CurveDB\New folder\Curva\_cumarico\_mayo\_3.cdb 14 May 2021 22:47:41

Compound name: ac. cumarico

|   | # Name     | Type    | RT   | Area    | Response | ug/mL | %Dev |
|---|------------|---------|------|---------|----------|-------|------|
| 1 | 1 cafe-004 | Analyte | 5.09 | 160.255 | 160.255  | 0.071 |      |

Compound name: ac. cumarico

Coefficient of Determination:  $R^2 = 0.988514$ Calibration curve:  $2260.45 * x$ 

Response type: External Std, Area

Curve type: Linear, Origin: Force, Weighting: 1/x, Axis trans: None

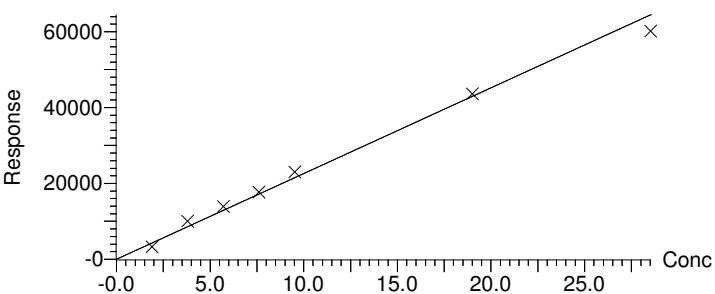

Dataset: Untitled

Last Altered: Friday, May 14, 2021 22:47:41 Mountain Daylight Time (Mexico)

Printed: Friday, May 14, 2021 22:47:54 Mountain Daylight Time (Mexico)

Method: C:\MassLynx\waters1.PRO\MethDB\Mayo cumarico 3.mdb 14 May 2021 15:21:28

Calibration: C:\MassLynx\waters1.PRO\CurveDB\New folder\Curva\_cumarico\_mayo\_3.cdb 14 May 2021 22:47:41

Compound name: ac. cumarico

Coefficient of Determination:  $R^2 = 0.988514$

Calibration curve:  $2260.45 * x$

Response type: External Std, Area

Curve type: Linear, Origin: Force, Weighting: 1/x, Axis trans: None

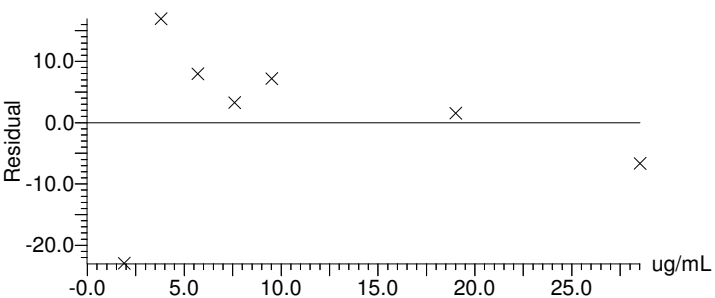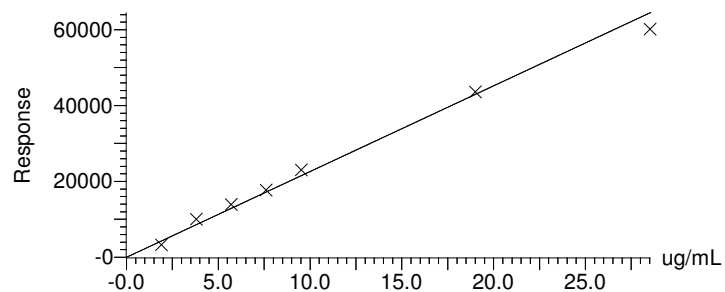

Dataset: Untitled

Last Altered: Friday, May 14, 2021 22:47:41 Mountain Daylight Time (Mexico)

Printed: Friday, May 14, 2021 22:47:54 Mountain Daylight Time (Mexico)

Method: C:\MassLynx\waters1.PRO\MethDB\Mayo cumarico 3.mdb 14 May 2021 15:21:28

Calibration: C:\MassLynx\waters1.PRO\CurveDB\New folder\Curva\_cumarico\_mayo\_3.cdb 14 May 2021 22:47:41

Name: cafe-004, Date: 14-May-2021, Time: 15:03:41, ID: , Description: 1

**ac. cumarico**

cafe-004 Smooth(Mn,3x2) F7:TOF Daughter,ES-

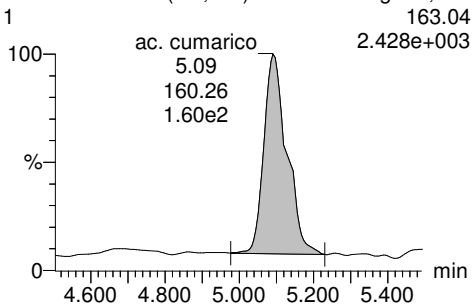

| ID | Name         | Trace  | RT   | Area    | ug/mL |
|----|--------------|--------|------|---------|-------|
|    | ac. cumarico | 163.04 | 5.09 | 160.255 | 0.071 |
