# Supplementary material for: Polyphenolic Extracts from Spent Coffee Grounds Prevent H2O2-Induced Oxidative Stress in Centropomus viridis Brain Cells
Source: MDPI journal article supplement (doi:10.3390/molecules26206195), 2021-10-14
Supplement: s1 [file s1]

Dataset: Untitled

Last Altered: Friday, May 14, 2021 22:49:55 Mountain Daylight Time (Mexico)

Printed: Friday, May 14, 2021 22:50:18 Mountain Daylight Time (Mexico)

Method: C:\MassLynx\waters1.PRO\MethDB\Mayo galico 3.mdb 14 May 2021 15:22:29

Calibration: C:\MassLynx\waters1.PRO\CurveDB\New folder\Curva\_galico\_mayo\_3.cdb 14 May 2021 15:18:53

Compound name: ac. galico

|   | # Name     | Type    | RT   | Area    | Response | ug/mL | %Dev |
|---|------------|---------|------|---------|----------|-------|------|
| 1 | 1 cafe-004 | Analyte | 1.59 | 639.337 | 639.337  | 0.434 |      |

Compound name: ac. galico

Correlation coefficient:  $r = 0.998427$ ,  $r^2 = 0.996857$ Calibration curve:  $2699.53 * x + -532.521$ 

Response type: External Std, Area

Curve type: Linear, Origin: Exclude, Weighting: 1/x, Axis trans: None

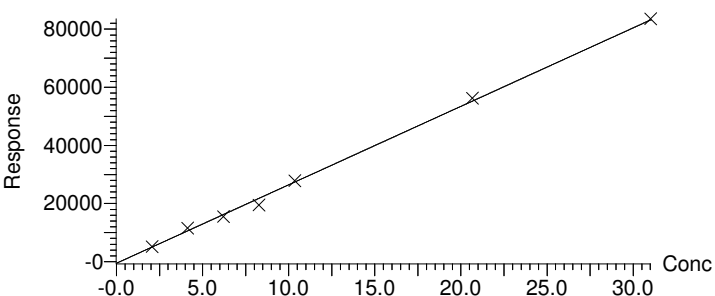

Dataset: Untitled

Last Altered: Friday, May 14, 2021 22:49:55 Mountain Daylight Time (Mexico)

Printed: Friday, May 14, 2021 22:50:18 Mountain Daylight Time (Mexico)

Method: C:\MassLynx\waters1.PRO\MethDB\Mayo galico 3.mdb 14 May 2021 15:22:29

Calibration: C:\MassLynx\waters1.PRO\CurveDB\New folder\Curva\_galico\_mayo\_3.cdb 14 May 2021 15:18:53

Compound name: ac. galico

Correlation coefficient:  $r = 0.998427$ ,  $r^2 = 0.996857$

Calibration curve:  $2699.53 * x + -532.521$

Response type: External Std, Area

Curve type: Linear, Origin: Exclude, Weighting: 1/x, Axis trans: None

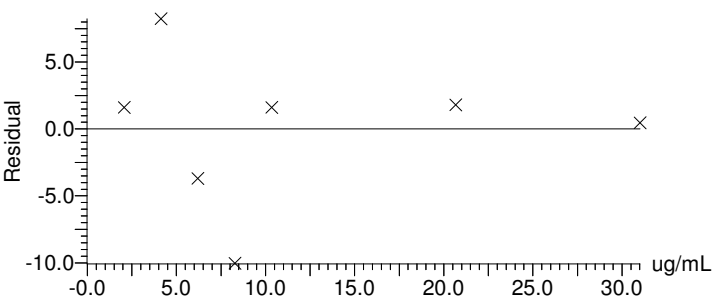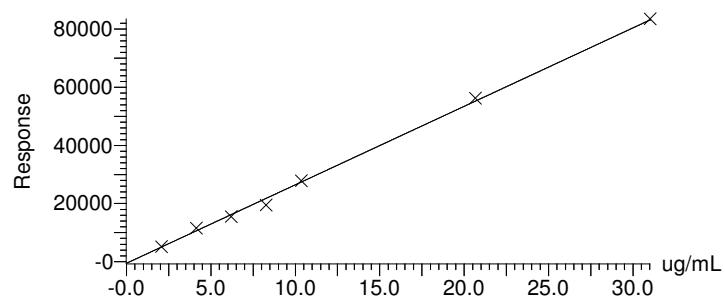

Dataset: Untitled

Last Altered: Friday, May 14, 2021 22:49:55 Mountain Daylight Time (Mexico)

Printed: Friday, May 14, 2021 22:50:18 Mountain Daylight Time (Mexico)

Method: C:\MassLynx\waters1.PRO\MethDB\Mayo galico 3.mdb 14 May 2021 15:22:29

Calibration: C:\MassLynx\waters1.PRO\CurveDB\New folder\Curva\_galico\_mayo\_3.cdb 14 May 2021 15:18:53

Name: cafe-004, Date: 14-May-2021, Time: 15:03:41, ID: , Description: 1

**ac. galico**

cafe-004 Smooth(Mn,3x2) F3:TOF Daughter,ES-

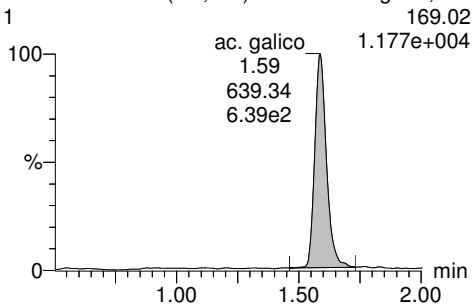

| ID | Name       | Trace  | RT   | Area    | ug/mL |
|----|------------|--------|------|---------|-------|
|    | ac. galico | 169.02 | 1.59 | 639.337 | 0.434 |
