# Supplementary material for: Polyphenolic Extracts from Spent Coffee Grounds Prevent H2O2-Induced Oxidative Stress in Centropomus viridis Brain Cells
Source: MDPI journal article supplement (doi:10.3390/molecules26206195), 2021-10-14
Supplement: s1 [file s1]

Dataset: Untitled

Last Altered: Friday, May 14, 2021 22:46:36 Mountain Daylight Time (Mexico)

Printed: Friday, May 14, 2021 22:46:48 Mountain Daylight Time (Mexico)

Method: C:\MassLynx\waters1.PRO\MethDB\Mayo cafeico 3.mdb 14 May 2021 15:20:57

Calibration: C:\MassLynx\waters1.PRO\CurveDB\New folder\Curva\_cafeico\_mayo\_3.cdb 14 May 2021 15:15:15

Compound name: ac. cafeico

|   | # Name     | Type    | RT   | Area      | Response  | ug/mL | %Dev |
|---|------------|---------|------|-----------|-----------|-------|------|
| 1 | 1 cafe-004 | Analyte | 4.19 | 11330.568 | 11330.568 | 2.024 |      |

Compound name: ac. cafeico

Correlation coefficient:  $r = 0.994236$ ,  $r^2 = 0.988504$ Calibration curve:  $4724.73 * x + 1768.68$ 

Response type: External Std, Area

Curve type: Linear, Origin: Exclude, Weighting: 1/x, Axis trans: None

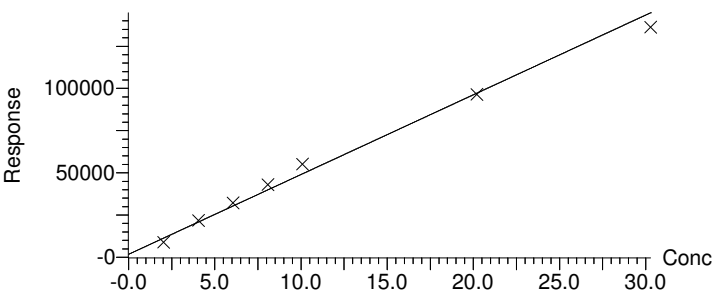

Dataset:        Untitled

Last Altered:    Friday, May 14, 2021 22:46:36 Mountain Daylight Time (Mexico)

Printed:         Friday, May 14, 2021 22:46:48 Mountain Daylight Time (Mexico)

Method: C:\MassLynx\waters1.PRO\MethDB\Mayo cafeico 3.mdb 14 May 2021 15:20:57

Calibration: C:\MassLynx\waters1.PRO\CurveDB\New folder\Curva\_cafeico\_mayo\_3.cdb 14 May 2021 15:15:15

Compound name: ac. cafeico

Correlation coefficient:  $r = 0.994236$ ,  $r^2 = 0.988504$

Calibration curve:  $4724.73 * x + 1768.68$

Response type: External Std, Area

Curve type: Linear, Origin: Exclude, Weighting: 1/x, Axis trans: None

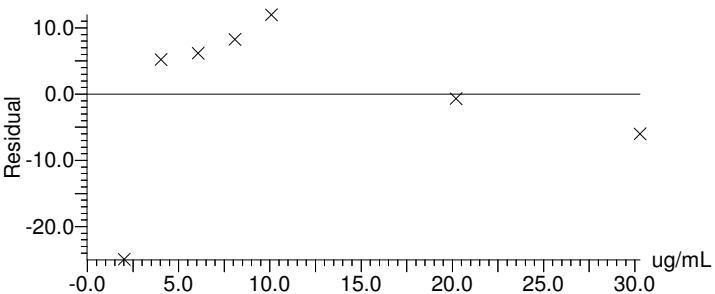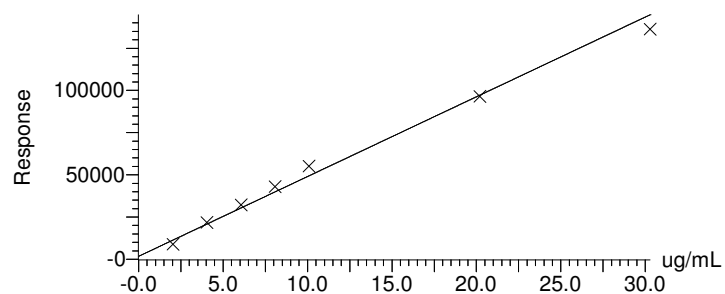

Dataset: Untitled

Last Altered: Friday, May 14, 2021 22:46:36 Mountain Daylight Time (Mexico)

Printed: Friday, May 14, 2021 22:46:48 Mountain Daylight Time (Mexico)

Method: C:\MassLynx\waters1.PRO\MethDB\Mayo cafeico 3.mdb 14 May 2021 15:20:57

Calibration: C:\MassLynx\waters1.PRO\CurveDB\New folder\Curva\_cafeico\_mayo\_3.cdb 14 May 2021 15:15:15

Name: cafe-004, Date: 14-May-2021, Time: 15:03:41, ID: , Description: 1

**ac. cafeico**

cafe-004 Smooth(Mn,3x2) F5:TOF Daughter,ES-

1 179.04  
1.931e+005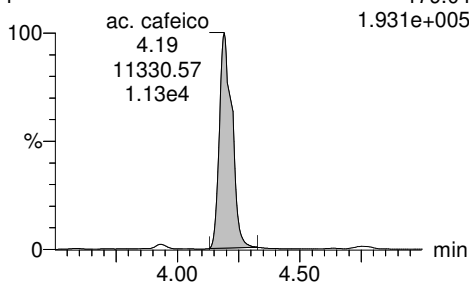

| ID | Name        | Trace  | RT   | Area      | ug/mL |
|----|-------------|--------|------|-----------|-------|
|    | ac. cafeico | 179.04 | 4.19 | 11330.568 | 2.024 |
