# Supplementary material for: Polyphenolic Extracts from Spent Coffee Grounds Prevent H2O2-Induced Oxidative Stress in Centropomus viridis Brain Cells
Source: MDPI journal article supplement (doi:10.3390/molecules26206195), 2021-10-14
Supplement: s1 [file s1]

Dataset: Untitled

Last Altered: Friday, May 14, 2021 22:48:54 Mountain Daylight Time (Mexico)

Printed: Friday, May 14, 2021 22:49:15 Mountain Daylight Time (Mexico)

Method: C:\MassLynx\waters1.PRO\MethDB\Mayo ferulico 3 tiempo.mdb 14 May 2021 15:21:58

Calibration: C:\MassLynx\waters1.PRO\CurveDB\New folder\Curva\_ferulico\_mayo\_tiempo\_3.cdb 14 May 2021 15:17:25

Compound name: ac ferulico

|   | # Name     | Type    | RT   | Area     | Response | ug/mL | %Dev |
|---|------------|---------|------|----------|----------|-------|------|
| 1 | 1 cafe-004 | Analyte | 5.53 | 1048.208 | 1048.208 | 2.138 |      |

Compound name: ac ferulico

Correlation coefficient:  $r = 0.989711$ ,  $r^2 = 0.979527$ Calibration curve:  $486.244 * x + 8.6903$ 

Response type: External Std, Area

Curve type: Linear, Origin: Exclude, Weighting: 1/x, Axis trans: None

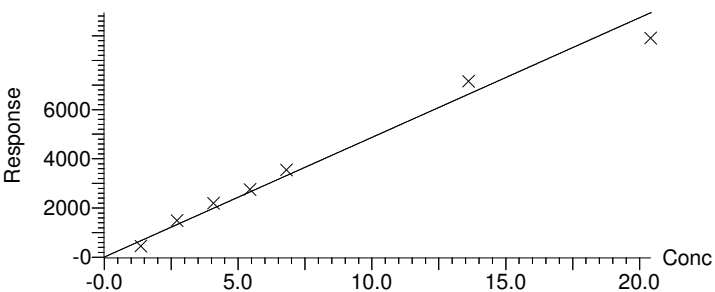

Dataset:        Untitled

Last Altered:    Friday, May 14, 2021 22:48:54 Mountain Daylight Time (Mexico)

Printed:        Friday, May 14, 2021 22:49:15 Mountain Daylight Time (Mexico)

Method: C:\MassLynx\waters1.PRO\MethDB\Mayo ferulico 3 tiempo.mdb 14 May 2021 15:21:58

Calibration: C:\MassLynx\waters1.PRO\CurveDB\New folder\Curva\_ferulico\_mayo\_tiempo\_3.cdb 14 May 2021 15:17:25

Compound name: ac ferulico

Correlation coefficient:  $r = 0.989711$ ,  $r^2 = 0.979527$ Calibration curve:  $486.244 * x + 8.6903$ 

Response type: External Std, Area

Curve type: Linear, Origin: Exclude, Weighting: 1/x, Axis trans: None

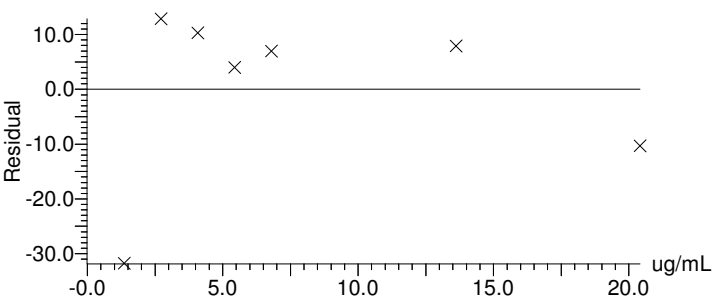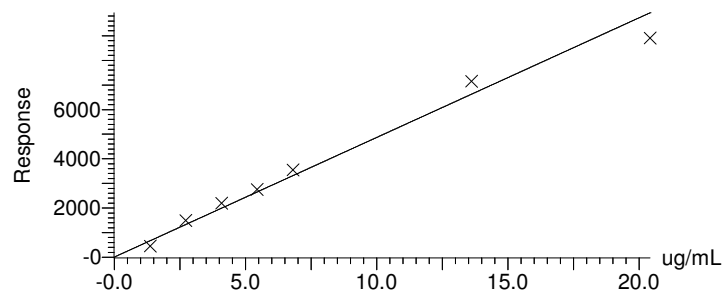

Dataset: Untitled

Last Altered: Friday, May 14, 2021 22:48:54 Mountain Daylight Time (Mexico)

Printed: Friday, May 14, 2021 22:49:15 Mountain Daylight Time (Mexico)

Method: C:\MassLynx\waters1.PRO\MethDB\Mayo ferulico 3 tiempo.mdb 14 May 2021 15:21:58

Calibration: C:\MassLynx\waters1.PRO\CurveDB\New folder\Curva\_ferulico\_mayo\_tiempo\_3.cdb 14 May 2021 15:17:25

Name: cafe-004, Date: 14-May-2021, Time: 15:03:41, ID: , Description: 1

**ac ferulico**

cafe-004 Smooth(Mn,3x2) F8:TOF Daughter,ES-

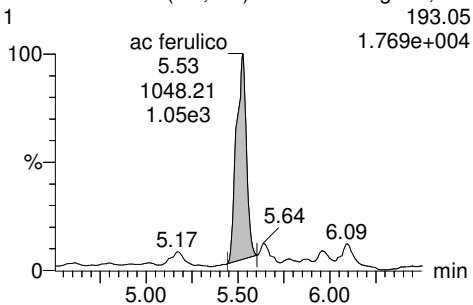

| ID | Name        | Trace  | RT   | Area     | ug/mL |
|----|-------------|--------|------|----------|-------|
|    | ac ferulico | 193.05 | 5.53 | 1048.208 | 2.138 |
